# Supplementary material
Source: Springer Nature journal article supplement (https://www.springermedizin.de/resource/supplementary/12891_2012_1685_MOESM2_ESM.pdf/9509136)

# Effect size and confidence interval

Step Frequency (Hz)

ML

Dynamic stability ( $\lambda^*$ ) V

AP

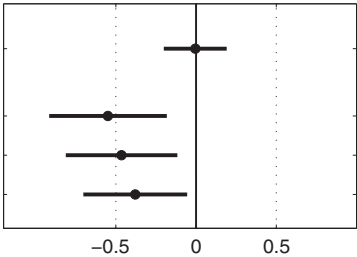

Supplement: MOESM2 [file 9509136]
